# Supplementary material for: Alternating droplet generation and controlled dynamic droplet fusion in microfluidic device for CdS nanoparticle synthesis
Source: Royal Society of Chemistry journal article supplement (doi:10.1039/b513908b), 2006-01-01
Supplement: b513908b.pdf [file b513908b.pdf]

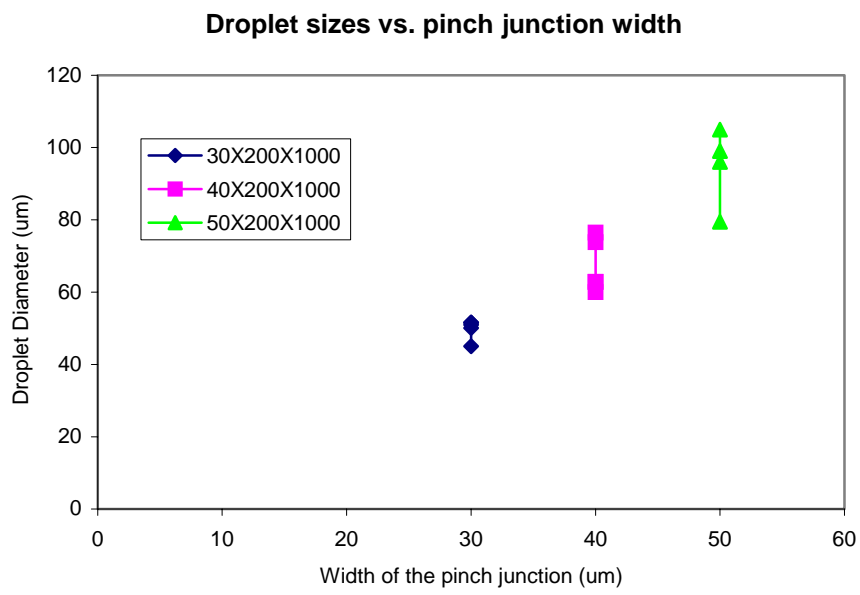

**Figure a.** Experiment results indicate that droplet sizes are mainly controlled by the width of the pinch junction due to the shear force applied.
